# Supplementary material for: Role of Mex67-Mtr2 in the Nuclear Export of 40S Pre-Ribosomes
Source: PubMed Central journal article supplement (PMC3431309; doi:10.1371/journal.pgen.1002915), 2012-08-30
Supplement: pgen.1002915.s008.pdf [file pgen.1002915.s008.pdf]

Table S1. **Plasmids used in this study**

| Plasmid                          | Relevant markers                    | Source     |
|----------------------------------|-------------------------------------|------------|
| pRS316-S2-eGFP                   | RPS2-eGFP CEN URA3                  | [1]        |
| pRS314-SLX9                      | SLX9 CEN TRP1                       | this study |
| pRS315-SLX9                      | SLX9 CEN LEU2                       | this study |
| pRS316-SLX9                      | SLX9 CEN URA3                       | this study |
| pRS426-MEX67                     | MEX67 2 $\mu$ URA3                  | [2]        |
| pUN100-mex67-5                   | mex67(H400Y) CEN LEU2               | [3]        |
| pRS426-MTR2                      | MTR2 2 $\mu$ URA3                   | [2]        |
| pUN100-ARX1                      | ARX1 CEN LEU2                       | this study |
| pRS314-ECM1                      | ECM1 CEN TRP1                       | [4]        |
| pRS316-NMD3                      | NMD3 CEN URA3                       | [5]        |
| pRS426-RRP12                     | RRP12 2 $\mu$ URA3                  | this study |
| pRS315-mex67 $\Delta$ C1         | mex67( $\Delta$ 525-599aa) CEN LEU2 | [6]        |
| pRS314-mex67 $\Delta$ loop       | mex67( $\Delta$ 409-435aa) CEN TRP1 | [7]        |
| pRS314-mtr2 $\Delta$ loop116-137 | mtr2( $\Delta$ 116-137aa) CEN TRP1  | [7]        |
| pRS316-L25-eGFP                  | RPL25-GFP CEN URA3                  | [8]        |
| pRS314-nmd3 $\Delta$ NES1        | nmd3 $\Delta$ NES1 CEN TRP1         | [7]        |
| pUN100-SUB2                      | SUB2 CEN LEU2                       | [9]        |
| pRS315-sub2-85                   | sub2-85 CEN LEU2                    | [9]        |
| pUN100-YRA1                      | YRA1 CEN LEU2                       | [10]       |
| pRS315-yra1 $\Delta$ RRM         | yra1 $\Delta$ RRM CEN LEU2          | [10]       |
| pRS315-YVH1                      | YVH1 CEN LEU2                       | [11]       |
| pRS313-XPO1                      | XPO1 CEN HIS3                       | [12]       |
| pRS313-xpo1-1                    | xpo1-1 CEN HIS3                     | [12]       |

1. Milkereit P, Strauss D, Bassler J, Gadal O, Kühn H, et al. (2003) A Noc complex specifically involved in the formation and nuclear export of ribosomal 40 S subunits. *J Biol Chem* 278: 4072-4081.

2. Hung N-J, Lo K-Y, Patel SS, Helmke K, Johnson AW (2008) Arx1 is a nuclear export receptor for the 60S ribosomal subunit in yeast. *Mol Biol Cell* 19: 735-744.

3. Segref A, Sharma K, Doye V, Hellwig A, Huber J, et al. (1997) Mex67p, a novel factor for nuclear mRNA export, binds to both poly(A)<sup>+</sup> RNA and nuclear pores. *EMBO J* 16: 3256-3271.

4. Baßler J, Grandi P, Gadal O, Leßmann T, Petfalski E, et al. (2001) Identification of a 60S Preribosomal Particle that Is Closely Linked to Nuclear Export. *Mol Cell* 8: 517-529.

5. Gadal O, Strauß D, Kessler J, Trumpower B, Tollervey D, et al. (2001) Nuclear export of 60S ribosomal subunits depends on Xpo1p and requires a nuclear export sequence-containing

factor, Nmd3p, that associates with the large subunit protein Rpl10p. *Mol Cell Biol* 21: 3405-3415.

6. Strässer K, Baßler J, Hurt E (2000) Binding of the Mex67p/Mtr2p heterodimer to FXFG, GLFG, and FG repeat nucleoporins is essential for nuclear mRNA export. *J Cell Biol* 150: 695-706.

7. Yao W, Roser D, Köhler A, Bradatsch B, Baßler J, et al. (2007) Nuclear export of ribosomal 60S subunits by the general mRNA export receptor Mex67-Mtr2. *Mol Cell* 26: 51-62.

8. Hurt E, Hannus S, Schmelzl B, Lau D, Tollervey D, et al. (1999) A novel in vivo assay reveals inhibition of ribosomal nuclear export in Ran-cycle and nucleoporin mutants. *J Cell Biol* 144: 389-401.

9. Strässer K, Hurt E (2001) Splicing factor Sub2p is required for nuclear mRNA export through its interaction with Yra1p. *Nature* 413: 648-652.

10. Strässer K, Masuda S, Mason P, Pfannstiel J, Oppizzi M, et al. (2002) TREX is a conserved complex coupling transcription with messenger RNA export. *Nature* 417: 304-308.

11. Kemmler S, Occhipinti L, Veisu M, Panse VG (2009) Yvh1 is required for a late maturation step in the 60S biogenesis pathway. *J Cell Biol* 186: 863-880.

12. Bradatsch B, Katahira J, Kowalinski E, Bange G, Yao W, et al. (2007) Arx1 functions as an unorthodox nuclear export receptor for the 60S preribosomal subunit. *Mol Cell* 27: 767-779.
