# Supplementary material for: Role of Mex67-Mtr2 in the Nuclear Export of 40S Pre-Ribosomes
Source: PubMed Central journal article supplement (PMC3431309; doi:10.1371/journal.pgen.1002915), 2012-08-30
Supplement: pgen.1002915.s009.pdf [file pgen.1002915.s009.pdf]

Table S2. Yeast strains used in this study

| Strain name                         | Genotype                                                                                                                          | Origin          |
|-------------------------------------|-----------------------------------------------------------------------------------------------------------------------------------|-----------------|
| BY4741                              | <i>MATa ura3 his3 leu2 met15 TRP1</i>                                                                                             | Euroscarf       |
| Arx1-TAP                            | <i>MATα his3 leu2 ura3 Arx1-TAP::TRP1</i>                                                                                         | [1]             |
| Enp1-TAP                            | <i>MATa ura3 his3 leu2 TRP1 Enp1-TAP::HIS3MX</i>                                                                                  | Open biosystems |
| Enp1-TAP<br><i>mex67</i> shuffle    | <i>MATα ura3 his3 leu2 ade2 TRP1 mex67::HIS3MX<br/>ENP1-TAP::HIS3MX &lt;pRS316-MEX67&gt;</i>                                      | this study      |
| Enp1-TAP<br><i>mtr2</i> shuffle     | <i>MATα ura3 his3 leu2 ade2 TRP1 mtr2::HIS3MX<br/>ENP1-TAP::HIS3MX &lt;pRS316-MTR2&gt;</i>                                        | this study      |
| Enp1-TAP <i>slx9Δ</i>               | <i>MATa ura3 his3 leu2 TRP1 Enp1-TAP::HIS3MX<br/>slx9::NATNT2</i>                                                                 | this study      |
| Hrr25-TAP                           | <i>MATa ura3 his3 leu2 TRP1 Hrr25-TAP::HIS3MX</i>                                                                                 | Open biosystems |
| Kre35-TAP                           | <i>MATα ura3 his3 leu2 trp1 met15 Kre35-TAP::TRP1</i>                                                                             | [1]             |
| <i>mex67</i> shuffle <i>slx9Δ</i>   | <i>MATa ura3 his3 leu2 trp1 ade2 mex67::HIS3MX<br/>slx9::KANMX &lt;pRS316-MEX67&gt;</i>                                           | this study      |
| <i>mex67</i> shuffle <i>yrb2Δ</i>   | <i>MATa ura3 his3 leu2 trp1 ade2 mex67::HIS3MX<br/>&lt;pRS316-MEX67&gt; yrb2::KAN</i>                                             | this study      |
| <i>mex67</i> shuffle <i>rps15-1</i> | <i>MATa ura3 his3 leu2 trp1 ade2 mex67::HIS3MX<br/>&lt;pRS316-MEX67&gt; rps15::KAN &lt;pRS316-MEX67&gt;<br/>&lt;Rps15-LEU&gt;</i> | this study      |
| <i>mex67</i> shuffle <i>bud23Δ</i>  | <i>MATa ura3 his3 leu2 ade2 mex67::HIS3MX<br/>bud23::KANMX &lt;pRS316-MEX67&gt;</i>                                               | this study      |
| <i>mex67</i> shuffle <i>rps6aΔ</i>  | <i>MATa ura3 his3 leu2 ade2 mex67::HIS3MX<br/>rps6a::KANMX &lt;pRS316-MEX67&gt;</i>                                               | this study      |
| <i>mex67</i> shuffle <i>ltv1Δ</i>   | <i>MATa ura3 his3 leu2 trp1 ade2 mex67::HIS3MX<br/>ltv1::KAN &lt;pRS316-MEX67&gt;</i>                                             | this study      |
| <i>mtr2</i> shuffle <i>slx9Δ</i>    | <i>MATa ura3 his3 leu2 trp1 ade2 mtr2::HIS3MX<br/>slx9::KANMX &lt;pRS316-MTR2&gt;</i>                                             | this study      |
| <i>mtr2</i> shuffle <i>yrb2Δ</i>    | <i>MATa ura3 his3 leu2 trp1 ade2 mtr2::HIS3MX<br/>yrb2::KAN &lt;pRS316-MTR2&gt;</i>                                               | this study      |
| <i>mtr2</i> shuffle <i>rps15-1</i>  | <i>MATa ura3 his3 leu2 trp1 ade2 mtr2::HIS3MX<br/>rps15::KAN &lt;pRS316-MTR2&gt; &lt;Rps15-LEU&gt;</i>                            | this study      |
| <i>mtr2</i> shuffle <i>bud23Δ</i>   | <i>MATa ura3 his3 leu2 ade2 mtr2::HIS3MX<br/>bud23::KANMX &lt;pRS316-MTR2&gt;</i>                                                 | this study      |

|                                       |                                                                                                |                 |
|---------------------------------------|------------------------------------------------------------------------------------------------|-----------------|
| <i>mtr2</i> shuffle <i>rps6a</i> Δ    | <i>MAT</i> α <i>ura3 his3 leu2 ade2 mtr2::HIS3MX rps6a::KANMX</i> <pRS316-MTR2>                | this study      |
| <i>mtr2</i> shuffle <i>ltv1</i> Δ     | <i>MAT</i> α <i>ura3 his3 leu2 trp1 ade2 mtr2::HIS3MX ltv1::KAN</i> <pRS316-MTR2>              | this study      |
| <i>nmd3</i> shuffle <i>slx9</i> Δ     | <i>MAT</i> α <i>his3 leu2 ura3 trp1 slx9::HIS3MX nmd3::KANMX4</i> <pRS316-NMD3>                | this study      |
| Noc4-TAP                              | <i>MAT</i> α <i>ura3 his3 leu2 TRP1 Noc4-TAP::HIS3MX</i>                                       | Open biosystems |
| Rio2-TAP                              | <i>MAT</i> α <i>ura3 his3 leu2 TRP1 Rio2-TAP::HIS3MX</i>                                       | Open biosystems |
| Rio2-TAP<br><i>mex67</i> shuffle      | <i>MAT</i> α <i>ura3 his3 leu2 trp1 ade2 mex67::HIS3MX Rio2-TAP::KANMX</i> <pRS316-MEX67>      | this study      |
| Rio2-TAP<br><i>mtr2</i> shuffle       | <i>MAT</i> α <i>ura3 his3 leu2 trp1 ade2 mtr2::HIS3MX Rio2-TAP::KANMX</i> <pRS316-MTR2>        | this study      |
| Rio2-TAP <i>yrb2</i> Δ                | <i>MAT</i> α; <i>his3D1; leu2D0; met15D0; yrb2::KANMX RIO2-TAP::URA</i>                        | this study      |
| Rix1-TAP                              | <i>MAT</i> α <i>ura3 his3 leu2 trp1 met15 Rix1-TAP::TRP1</i>                                   | [1]             |
| <i>GAL-rps15-1</i>                    | <i>MAT</i> α <i>his3 leu2 ura3 rps15::KANMX</i> <pFL36-pGal-rps15-1>                           | [2]             |
| <i>Slx9</i> -GFP <i>Gar1</i> -mCherry | <i>MAT</i> α/ <i>MAT</i> α <i>ura3 his3 leu2 met15 TRP1 slx9GFP::HIS3MX Gar1mCherry::KANMX</i> | this study      |
| <i>slx9</i> Δ                         | <i>MAT</i> α <i>ura3 his3 leu2 TRP1 slx9::KANMX</i>                                            | this study      |
| <i>slx9</i> Δ                         | <i>MAT</i> α <i>ura3 his3 leu2 TRP1 slx9::HIS3MX</i>                                           | this study      |
| <i>slx9</i> Δ <i>arx1</i> Δ           | <i>MAT</i> α <i>ura3 his3 leu2 TRP1 slx9::NATNT2 arx1::KANMX</i>                               | this study      |
| <i>slx9</i> Δ <i>ecm1</i> Δ           | <i>MAT</i> α <i>ura3 his3 leu2 TRP1 slx9::NATNT2 ecm1::KANMX</i>                               | this study      |
| <i>slx9</i> Δ <i>sub2</i> shuffle     | <i>MAT</i> α <i>ura3 his3 leu2 TRP1 slx9::KANMX sub2::KAN</i> <pRS316-SUB2>                    | this study      |
| <i>slx9</i> Δ <i>yra1</i> shuffle     | <i>MAT</i> α <i>ura3 his3 leu2 TRP1 slx9::KANMX yra1::HIS3</i> <pRS316-YRA1>                   | this study      |
| Ssf1-TAP                              | <i>MAT</i> α <i>his3 leu2 ura3 Ssf1-TAP ::TRP1</i>                                             | [1]             |
| <i>xpo1-1</i>                         | <i>MAT</i> α <i>ura3 his3 leu2 ade2 trp1 can1 xpo1::LEU2</i> <pKW457-xpo1-1-HIS3>              | [3]             |
| <i>yvh1</i> Δ                         | <i>MAT</i> α <i>ura3 his3 leu2 TRP1 yvh1::KANMX</i>                                            | [4]             |

1. Yao W, Roser D, Köhler A, Bradatsch B, Baßler J, et al. (2007) Nuclear export of ribosomal 60S subunits by the general mRNA export receptor Mex67-Mtr2. *Mol Cell* 26: 51-62.
2. Léger-Silvestre I, Milkereit P, Ferreira-Cerca S, Saveanu C, Rousselle J-C, et al. (2004) The ribosomal protein Rps15p is required for nuclear exit of the 40S subunit precursors in yeast. *EMBO J* 23: 2336-2347.
3. Stade K, Ford CS, Guthrie C, Weis K (1997) Exportin 1 (Crm1p) is an essential nuclear export factor. *Cell* 90: 1041-1050.
4. Kemmler S, Occhipinti L, Veisu M, Panse VG (2009) Yvh1 is required for a late maturation step in the 60S biogenesis pathway. *J Cell Biol* 186: 863-880.
